# Supplementary material
Source: publisher site journal article supplement (https://www.dovepress.com/get_supplementary_file.php?f=469813.docx)
Supplement: Supplementary file 1 [file get_supplementary_file.php]

**ADDITIONAL FILES**

**Additional Table 1** - Primer sequences of genes evaluated in this paper.

| **INFLAMMATION** | **FORWARD (5’🡪 3’)** | **REVERSE (5’🡪 3’)** |
| --- | --- | --- |
| *tnfα* | CGCTGGTGATGGTGTCTAGG | CCCTGGGTCTTATGGAGCGT |
| *Il8* | GTCGCTGCATTGAAACAGAA | CTTAACCCATGGAGCAGAGG |
| *il6* | GGCATTTGAAGGGGTCAGGA | GCGTTAGACATCTTTCCGTGC |
| *il1β* | CGTACTCAAGGAGATCAGCGG | GCGGTGCTGATAAACCAACC |
| *nfkbiaa* | ACAACCGAAGAGAGAACATGGA | CGAAATCTCCCGCGTCTCAT |
| *ccl34a.4* | CTTTGACGCATGGAGGATTT | TGCAGCTCAACCAGAAGATG |
| *Nfkb2* | TGGCTGGAGCACTAAGGATG | CCTCTCTGCTTTGGCTCCTC |
| *Ism12b* | AGTTGTCCCAAGCCTATGCAATCAG | CCACTCAGGAGGATAAAGACGAGTC |
| **REGENERATION** |  |  |
| *wnt4a* | CAATGCGAGCAACTGGCTATAC | AATGCAGCTTCCCTCGTACCTT |
| *gsk3β* | TCTGCTCACCGTTTCCTTTC | CTCCGACCCACTTAACTCCA |
| *β-catenin* | GGAGCTCACCAGCTCTCTGT | TAGCTTGGGTCGTCCTGTC |
| *wnt10b* | TCCTGAAACAGGCTCGAAGT | GCTGCTCACTTGCACACA |
| *mobk13* | CACCCGTTTCGTGATGAAGTACAA | GTTAAGCAGGATTTACAATGGAG |

**Additional Table 2** - Supplementary table reporting values of gene expression levels after LPS-induced inflammation

| *tnfα* | **Samples** | **Mean ± SD** | ***p value*** |
| --- | --- | --- | --- |
| Ctrl vs LPS | -0.35 ± 1.29 vs 4.46 ± 1.66 | *p = 0.014* |
| Ctrl vs LPS-LigNPs | -0.35 ± 1.29 vs 3.92 ± 1.68 | *p = 0.026* |
| Ctrl vs LPS-PheLigNPs | -0.35 ± 1.29 vs 3.46 ± 1.50 | *p = 0.042* |
| Ctrl vs Ctrl-LigNPs | -0.35 ± 1.29 vs 0.38 ± 0.52 | *p = 0.672* |
| Ctrl vs Ctrl-PheLigNPs | -0.35 ± 1.29 vs -1.10 ± 3.94 | *p = 0.660* |
| LPS vs LPS-LigNPs | 4.46 ± 1.66 vs 3.92 ± 1.68 | *p = 0.751* |
| LPS vs LPS-PheLigNPs | 4.46 ± 1.66 vs 3.46 ± 1.50 | *p = 0.560* |
| LPS vs Ctrl-LigNPs | 4.46 ± 1.66 vs 0.38 ± 0.52 | *p = 0.0314* |
| LPS vs Ctrl-PheLigNPs | 4.46 ± 1.66 vs -1.10 ± 3.94 | *p = 0.0061* |
| LPS-LigNPs vs LPS-PheLigNPs | 3.92 ± 1.68 vs 3.46 ± 1.50 | *p = 0.7883* |
| LPS-LigNPs vs Crl-LigNPs | 3.92 ± 1.68 vs 0.38 ± 0.52 | *p = 0.0564* |
| LPS-LigNPs vs Ctrl-PheLigNPs | 3.92 ± 1.68 vs -1.10 ± 3.94 | *p = 0.0111* |
| LPS-PheLigNPs vs Ctrl-LigNPs | 3.46 ± 1.50 vs 0.38 ± 0.52 | *p = 0.0912* |
| LPS-PheLigNPs vs Ctrl-PheLigNPs | 3.46 ± 1.50 vs -1.10 ± 3.94 | *p = 0.0185* |
| Ctrl-LigNPs vs Ctrl-PheLigNPs | 0.38 ± 0.52 vs -1.10 ± 3.94 | *p = 0.3933* |
| *Il8* | **Samples** | **Mean ± SD** | ***p Value*** |
| Ctrl vs LPS | -3.14 ± 4.09 vs 0.67 ± 6.04 | *p = 0.2260* |
| Ctrl vs LPS-LigNPs | -3.14 ± 4.09 vs 5.47 ± 1.60 | *p = 0.0137* |
| Ctrl vs LPS-PheLigNPs | -3.14 ± 4.09 vs 3.52 ± 0.70 | *p = 0.0455* |
| Ctrl vs Ctrl-LigNPs | -3.14 ± 4.09 vs 0.45 ± 2.29 | *p = 0.2520* |
| Ctrl vs Ctrl-PheLigNPs | -3.14 ± 4.09 vs 0.07 ± 4.31 | *p = 0.3030* |
| LPS vs LPS-LigNPs | 0.67 ± 6.04 vs 5.47 ± 1.60 | *p = 0.1335* |
| LPS vs LPS-PheLigNPs | 0.67 ± 6.04 vs 3.52 ± 0.70 | *p = 0.3582* |
| LPS vs Ctrl-LigNPs | 0.67 ± 6.04 vs 0.45 ± 2.29 | *p = 0.9433* |
| LPS vs Ctrl-PheLigNPs | 0.67 ± 6.04 vs 0.07 ± 4.31 | *p = 0.8448* |
| LPS-LigNPs vs LPS-PheLigNPs | 5.47 ± 1.60 vs 3.52 ± 0.70 | *p = 0.5256* |
| LPS-LigNPs vs Crl-LigNPs | 5.47 ± 1.60 vs 0.45 ± 2.29 | *p = 0.1184* |
| LPS-LigNPs vs Ctrl-PheLigNPs | 5.47 ± 1.60 vs 0.07 ± 4.31 | *p = 0.0955* |
| LPS-PheLigNPs vs Ctrl-LigNPs | 3.52 ± 0.70 vs 0.45 ± 2.29 | *p = 0.3242* |
| LPS-PheLigNPs vs Ctrl-PheLigNPs | 3.52 ± 0.70 vs 0.07 ± 4.31 | *p = 0.2704* |
| Ctrl-LigNPs vs Ctrl-PheLigNPs | 0.45 ± 2.29 vs 0.07 ± 4.31 | *p = 0.9007* |
| *il6* | **Samples** | **Mean ± SD** | ***p Value*** |
| Ctrl vs LPS | -1.26 ± 3.17 vs 2.40 ± 2.96 | *p = 0.0986* |
| Ctrl vs LPS-LigNPs | -1.26 ± 3.17 vs 4.89 ± 1.54 | **p = 0.0108* |
| Ctrl vs LPS-PheLigNPs | -1.26 ± 3.17 vs 2.14 ± 1.61 | *p = 0.1218* |
| Ctrl vs Ctrl-LigNPs | -1.26 ± 3.17 vs 0.85 ± 1.00 | *p = 0.3208* |
| Ctrl vs Ctrl-PheLigNPs | -1.26 ± 3.17 vs -1.22 ± 3.58 | *p = 0.9822* |
| LPS vs LPS-LigNPs | 2.40 ± 2.96 vs 4.89 ± 1.54 | *p = 0.2453* |
| LPS vs LPS-PheLigNPs | 2.40 ± 2.96 vs 2.14 ± 1.61 | *p = 0.9021* |
| LPS vs Ctrl-LigNPs | 2.40 ± 2.96 vs 0.85 ± 1.00 | *p = 0.4647* |
| LPS vs Ctrl-PheLigNPs | 2.40 ± 2.96 vs -1.22 ± 3.58 | *p = 0.1025* |
| LPS-LigNPs vs LPS-PheLigNPs | 4.89 ± 1.54 vs 2.14 ± 1.61 | *p = 0.2028* |
| LPS-LigNPs vs Crl-LigNPs | 4.89 ± 1.54 vs 0.85 ± 1.00 | *p = 0.0715* |
| LPS-LigNPs vs Ctrl-PheLigNPs | 4.89 ± 1.54 vs -1.22 ± 3.58 | *p = 0.0113* |
| LPS-PheLigNPs vs Ctrl-LigNPs | 2.14 ± 1.61 vs 0.85 ± 1.00 | *p = 0.5408* |
| LPS-PheLigNPs vs Ctrl-PheLigNPs | 2.14 ± 1.61 vs -1.22 ± 3.58 | *p = 0.1265* |
| Ctrl-LigNPs vs Ctrl-PheLigNPs | 0.85 ± 1.00 vs -1.22 ± 3.58 | *p = 0.3311* |
| *il1β* | **Samples** | **Mean ± SD** | ***p Value*** |
| Ctrl vs LPS | -0.70 ± 2.13 vs 3.75 ± 2,97 | *p = 0.0292* |
| Ctrl vs LPS-LigNPs | -0.70 ± 2.13 vs 5.57 ± 1.75 | *p = 0.0045* |
| Ctrl vs LPS-PheLigNPs | -0.70 ± 2.13 vs 2.95 ± 2.71 | *p = 0.0652* |
| Ctrl vs Ctrl-LigNPs | -0.70 ± 2.13 vs 0.71 ± 0.94 | *p = 0.4455* |
| Ctrl vs Ctrl-PheLigNPs | -0.70 ± 2.13 vs 0.98 ± 2.14 | *p = 0.3682* |
| LPS vs LPS-LigNPs | 3.75 ± 2,97 vs 5.57 ± 1.75 | *p = 0.332* |
| LPS vs LPS-PheLigNPs | 3.75 ± 2,97 vs 2.95 ± 2.71 | *p = 0.6634* |
| LPS vs Ctrl-LigNPs | 3.75 ± 2,97 vs 0.71 ± 0.94 | *p = 0.1174* |
| LPS vs Ctrl-PheLigNPs | 3.75 ± 2,97 vs 0.98 ± 2.14 | *p = 0.1494* |
| LPS-LigNPs vs LPS-PheLigNPs | 5.57 ± 1.75 vs 2.95 ± 2.71 | *p = 0.1707* |
| LPS-LigNPs vs Crl-LigNPs | 5.57 ± 1.75 vs 0.71 ± 0.94 | *p = 0.0194* |
| LPS-LigNPs vs Ctrl-PheLigNPs | 5.57 ± 1.75 vs 0.98 ± 2.14 | *p = 0.0254* |
| LPS-PheLigNPs vs Ctrl-LigNPs | 2.95 ± 2.71 vs 0.71 ± 0.94 | *p = 0.2385* |
| LPS-PheLigNPs vs Ctrl-PheLigNPs | 2.95 ± 2.71 vs 0.98 ± 2.14 | *p = 0.2953* |
| Ctrl-LigNPs vs Ctrl-PheLigNPs | 0.71 ± 0.94 vs 0.98 ± 2.14 | *p = 0.8861* |
| *nfkbiaa* | **Samples** | **Mean ± SD** | ***p Value*** |
| Ctrl vs LPS | -2.41 ± 3.75 vs 2.28 ± 2.33 | *p = 0.0315* |
| Ctrl vs LPS-LigNPs | -2.41 ± 3.75 vs 4.18 ± 0.64 | *p = 0.0051* |
| Ctrl vs LPS-PheLigNPs | -2.41 ± 3.75 vs 3.62 ± 1.16 | *p = 0.0087* |
| Ctrl vs Ctrl-LigNPs | -2.41 ± 3.75 vs 2.89 ± 1.92 | *p = 0.0175* |
| Ctrl vs Ctrl-PheLigNPs | -2.41 ± 3.75 vs 0.66 ± 2.91 | *p = 0.1377* |
| LPS vs LPS-LigNPs | 2.28 ± 2.33 vs 4.18 ± 0.64 | *p = 0.3426* |
| LPS vs LPS-PheLigNPs | 2.28 ± 2.33 vs 3.62 ± 1.16 | *p = 0.4999* |
| LPS vs Ctrl-LigNPs | 2.28 ± 2.33 vs 2.89 ± 1.92 | *p = 0.7543* |
| LPS vs Ctrl-PheLigNPs | 2.28 ± 2.33 vs 0.66 ± 2.91 | *p = 0.4158* |
| LPS-LigNPs vs LPS-PheLigNPs | 4.18 ± 0.64 vs 3.62 ± 1.16 | *p = 0.7749* |
| LPS-LigNPs vs Ctrl-LigNPs | 4.18 ± 0.64 vs 2.89 ± 1.92 | *p = 0.5168* |
| LPS-LigNPs vs Ctrl-PheLigNPs | 4.18 ± 0.64 vs 0.66 ± 2.91 | *p = 0.0920* |
| LPS-PheLigNPs vs Ctrl-LigNPs | 3.62 ± 1.16 vs 2.89 ± 1.92 | *p = 0.7138* |
| LPS-PheLigNPs vs Ctrl-PheLigNPs | 3.62 ± 1.16 vs 0.66 ± 2.91 | *p = 0.1499* |
| Ctrl-LigNPs vs Ctrl-PheLigNPs | 2.89 ± 1.92 vs 0.66 ± 2.91 | *p = 0.2674* |
| *ccl34a.4* | **Samples** | **Mean ± SD** | ***p Value*** |
| Ctrl vs LPS | -1.13 ± 2.61 vs 2.25 ± 1.15 | *p = 0.0138* |
| Ctrl vs LPS-LigNPs | -1.13 ± 2.61 vs 3.77 ± 0.62 | *p = 0.0015* |
| Ctrl vs LPS-PheLigNPs | -1.13 ± 2.61 vs -0.13 ± 3.37 | *p = 0.3991* |
| Ctrl vs Ctrl-LigNPs | -1.13 ± 2.61 vs 0.64 ± 1.26 | *p = 0.1489* |
| Ctrl vs Ctrl-PheLigNPs | -1.13 ± 2.61 vs 0.85 ± 1.22 | *p = 0.1118* |
| LPS vs LPS-LigNPs | 2.25 ± 1.15 vs 3.77 ± 0.62 | *p = 0.2089* |
| LPS vs LPS-PheLigNPs | 2.25 ± 1.15 vs -0.13 ± 3.37 | *p = 0.0621* |
| LPS vs Ctrl-LigNPs | 2.25 ± 1.15 vs 0.64 ± 1.26 | *p = 0.1869* |
| LPS vs Ctrl-PheLigNPs | 2.25 ± 1.15 vs 0.85 ± 1.22 | *p = 0.2443* |
| LPS-LigNPs vs LPS-PheLigNPs | 3.77 ± 0.62 vs -0.13 ± 3.37 | *p = 0.0063* |
| LPS-LigNPs vs Ctrl-LigNPs | 3.77 ± 0.62 vs 0.64 ± 1.26 | *p = 0.0201* |
| LPS-LigNPs vs Ctrl-PheLigNPs | 3.77 ± 0.62 vs 0.85 ± 1.22 | *p = 0.0274* |
| LPS-PheLigNPs vs Ctrl-LigNPs | -0.13 ± 3.37 vs 0.64 ± 1.26 | *p = 0.5099* |
| LPS-PheLigNPs vs Ctrl-PheLigNPs | -0.13 ± 3.37 vs 0.85 ± 1.22 | *p = 0.4083* |
| Ctrl-LigNPs vs Ctrl-PheLigNPs | 0.64 ± 1.26 vs 0.85 ± 1.22 | *p = 0.8610* |
| *Nfkb2* | **Samples** | **Mean ± SD** | ***p Value*** |
| Ctrl vs LPS | -1.09 ± 2.82 vs 0.44 ± 0.66 | *p = 0.3581* |
| Ctrl vs LPS-LigNPs | -1.09 ± 2.82 vs 6.74 ± 0.32 | *p = 0.0006* |
| Ctrl vs LPS-PheLigNPs | -1.09 ± 2.82 vs 1.81 ± 1.60 | *p = 0.0975* |
| Ctrl vs Ctrl-LigNPs | -1.09 ± 2.82 vs 2.39 ± 0.17 | *p = 0.0524* |
| Ctrl vs Ctrl-PheLigNPs | -1.09 ± 2.82 vs -0.10 ± 3.29 | *p = 0.5475* |
| LPS vs LPS-LigNPs | 0.44 ± 0.66 vs 6.74 ± 0.32 | *p = 0.0026* |
| LPS vs LPS-PheLigNPs | 0.44 ± 0.66 vs 1.81 ± 1.60 | *p = 0.4076* |
| LPS vs Ctrl-LigNPs | 0.44 ± 0.66 vs 2.39 ± 0.17 | *p = 0.2444* |
| LPS vs Ctrl-PheLigNPs | 0.44 ± 0.66 vs -0.10 ± 3.29 | *p = 0.7403* |
| LPS-LigNPs vs LPS-PheLigNPs | 6.74 ± 0.32 vs 1.81 ± 1.60 | *p = 0.0110* |
| LPS-LigNPs vs Ctrl-LigNPs | 6.74 ± 0.32 vs 2.39 ± 0.17 | *p = 0.0209* |
| LPS-LigNPs vs Ctrl-PheLigNPs | 6.74 ± 0.32 vs -0.10 ± 3.29 | *p = 0.0015* |
| LPS-PheLigNPs vs Ctrl-LigNPs | 1.81 ± 1.60 vs 2.39 ± 0.17 | *p = 0.7174* |
| LPS-PheLigNPs vs Ctrl-PheLigNPs | 1.81 ± 1.60 vs -0.10 ± 3.29 | *p = 0.2559* |
| Ctrl-LigNPs vs Ctrl-PheLigNPs | 2.39 ± 0.17 vs -0.10 ± 3.29 | *p = 0.1458* |

**Additional Table 3** - Supplementary table reporting values of gene expression levels after wound-induced inflammation.

| *tnfα* | **Samples** | **Mean ± SD** | ***p value*** |
| --- | --- | --- | --- |
| Ctrl not wounded vs Ctrl wounded | 1.00 ± 0.12 vs 1.77 ± 0.44 | *p = 0.2095* |
| Ctrl not wounded vs Wounded LigNPs | 1.00 ± 0.12 vs 6.18 ± 0.72 | *p = 0.0001* |
| Ctrl not wounded vs Wounded PheLigNPs | 1.00 ± 0.12 vs 5.55 ± 1.71 | *p = 0.0003* |
| Ctrl wounded vs Wounded LigNPs | 2.04 ± 0.23 vs 6.18 ± 0.72 | *p = 0.0006* |
| Ctrl wounded vs Wounded PheLigNPs | 2.04 ± 0.23 vs 5.55 ± 1.71 | *p = 0.0018* |
| Wounded LigNPs vs Wounded PheLigNPs | 6.18 ± 0.72 vs 5.55 ± 1.71 | *p = 0.4338* |
| *Il8* | **Samples** | **Mean ± SD** | ***p Value*** |
| Ctrl not wounded vs Ctrl wounded | 1.00 ± 0.33 vs 2.32 ± 0.39 | *p = 0.0014* |
| Ctrl not wounded vs Wounded LigNPs | 1.00 ± 0.33 vs 1.50 ± 0.43 | *p = 0.1072* |
| Ctrl not wounded vs Wounded PheLigNPs | 1.00 ± 0.33 vs 0.73 ± 0.14 | *p = 0.3619* |
| Ctrl wounded vs Wounded LigNPs | 2.32 ± 0.39 vs 1.50 ± 0.43 | *p = 0.0182* |
| Ctrl wounded vs Wounded PheLigNPs | 2.32 ± 0.39 vs 0.73 ± 0.14 | *p = 0.0004* |
| Wounded LigNPs vs Wounded PheLigNPs | 1.50 ± 0.43 vs 0.73 ± 0.14 | *p = 0.0239* |
| *il6* | **Samples** | **Mean ± SD** | ***p Value*** |
| Ctrl not wounded vs Ctrl wounded | 1.00 ± 0.11 vs 3.34 ± 0.11 | *p = 0.0081* |
| Ctrl not wounded vs Wounded LigNPs | 1.00 ± 0.11 vs 10.10 ± 0.51 | *p = <0.0001* |
| Ctrl not wounded vs Wounded PheLigNPs | 1.00 ± 0.11 vs 7.74 ± 1.55 | *p = <0.0001* |
| Ctrl wounded vs Wounded LigNPs | 3.34 ± 0.11 vs 10.10 ± 0.51 | *p = <0.0001* |
| Ctrl wounded vs Wounded PheLigNPs | 3.34 ± 0.11 vs 7.74 ± 1.55 | *p = 0.0002* |
| Wounded LigNPs vs Wounded PheLigNPs | 10.10 ± 0.51 vs 7.74 ± 1.55 | *p = 0.0078* |
| *il1β* | **Samples** | **Mean ± SD** | ***p Value*** |
| Ctrl not wounded vs Ctrl wounded | 1.00 ± 0.04 vs 2.12 ± 0.26 | *p = 0.0678* |
| Ctrl not wounded vs Wounded LigNPs | 1.00 ± 0.04 vs 4.53 ± 0.32 | *p = 0.0002* |
| Ctrl not wounded vs Wounded PheLigNPs | 1.00 ± 0.04 vs 3.78 ± 1.24 | *p = 0.0008* |
| Ctrl wounded vs Wounded LigNPs | 2.12 ± 0.26 vs 4.53 ± 0.32 | *p = 0.0020* |
| Ctrl wounded vs Wounded PheLigNPs | 2.12 ± 0.26 vs ± 3.78 ± 1.24 | *p = 0.0145* |
| Wounded LigNPs vs Wounded PheLigNPs | 4.53 ± 0.32 vs 3.78 ± 1.24 | *p = 0.1962* |
| nfkbiaa | **Samples** | **Mean ± SD** | ***p Value*** |
| Ctrl not wounded vs Ctrl wounded | 1.00 ± 0.17 vs 3.05 ± 0.25 | *p = 0.0010* |
| Ctrl not wounded vs Wounded LigNPs | 1.00 ± 0.17 vs 4.73 ± 0.64 | *p < 0.0001* |
| Ctrl not wounded vs Wounded PheLigNPs | 1.00 ± 0.17 vs 3.23 ± 0.60 | *p = 0.0006* |
| Ctrl wounded vs Wounded LigNPs | 3.05 ± 0.25 vs 4.73 ± 0.64 | *p = 0.0035* |
| Ctrl wounded vs Wounded PheLigNPs | 3.05 ± 0.25 vs 3.23 ± 0.60 | *p = 0.6749* |
| Wounded LigNPs vs Wounded PheLigNPs | 4.73 ± 0.64 vs 3.23 ± 0.60 | *p = 0.0064* |
| *ccl34a.4* | **Samples** | **Mean ± SD** | ***p Value*** |
| Ctrl not wounded vs Ctrl wounded | 1.00 ± 0.11 vs 3.57 ± 0.51 | *p = 0.0006* |
| Ctrl not wounded vs Wounded LigNPs | 1.00 ± 0.11 vs 4.11 ± 0.86 | *p = 0.0002* |
| Ctrl not wounded vs Wounded PheLigNPs | 1.00 ± 0.11 vs 1.24 ± 0.58 | *p = 0.6227* |
| Ctrl wounded vs Wounded LigNPs | 3.57 ± 0.51 vs 4.11 ± 0.86 | *p = 0.2826* |
| Ctrl wounded vs Wounded PheLigNPs | 3.57 ± 0.51 vs 1.24 ± 0.58 | *p = 0.0012* |
| Wounded LigNPs vs Wounded PheLigNPs | 4.11 ± 0.86 vs 1.24 ± 0.58 | *p = 0.0003* |
| *Nfkb2* | **Samples** | **Mean ± SD** | ***p Value*** |
| Ctrl not wounded vs Ctrl wounded | 1.00 ± 0.14 vs 1.77 ± 0.44 | *p = 0.0165* |
| Ctrl not wounded vs Wounded LigNPs | 1.00 ± 0.14 vs 2.09 ± 0.26 | *p = 0.0027* |
| Ctrl not wounded vs Wounded PheLigNPs | 1.00 ± 0.14 vs 1.48 ± 0.33 | *p = 0.0971* |
| Ctrl wounded vs Wounded LigNPs | 1.77 ± 0.44 vs 2.09 ± 0.26 | *p = 0.2474* |
| Ctrl wounded vs Wounded PheLigNPs | 1.77 ± 0.44 vs 1.48 ± 0.33 | *p = 0.2867* |
| Wounded LigNPs vs Wounded PheLigNPs | 2.09 ± 0.26 vs 1.48 ± 0.33 | *p = 0.0439* |

**Additional Table 4** - Supplementary table reporting values of gene expression levels related to *wnt/β-catenin* signaling pathway.

| *wnt4a* | **Samples** | **Mean ± SD** | ***p value*** |
| --- | --- | --- | --- |
| Ctrl not wounded vs Ctrl wounded | -0.02 ± 0.30 vs 0.80 ± 0.04 | *p = 0.0316* |
| Ctrl not wounded vs Wounded LigNPs | -0.02 ± 0.30 vs -0.62 ± 0.37 | *p = 0.0941* |
| Ctrl not wounded vs Wounded PheLigNPs | -0.02 ± 0.30 vs -1.44 ± 0.60 | *p = 0.0019* |
| Ctrl wounded vs Wounded LigNPs | 0.80 ± 0.04 vs -0.62 ± 0.37 | *p = 0.0020* |
| Ctrl wounded vs Wounded PheLigNPs | 0.80 ± 0.04 vs -1.44 ± 0.60 | *p < 0.0001* |
| Wounded LigNPs vs Wounded PheLigNPs | -0.62 ± 0.37 vs -1.44 ± 0.60 | *p = 0.0301* |
| *β-catenin* | **Samples** | **Mean ± SD** | ***p Value*** |
| Ctrl not wounded vs Ctrl wounded | -0.003 ± 0.067 vs 0.25 ± 0.05 | *p = 0.2381* |
| Ctrl not wounded vs Wounded LigNPs | -0.003 ± 0.067 vs -0.68 ± 0.13 | *p = 0.0097* |
| Ctrl not wounded vs Wounded PheLigNPs | -0.003 ± 0.067 vs -1.37 ± 0.70 | *p = 0.0001* |
| Ctrl wounded vs Wounded LigNPs | 0.25 ± 0.05 vs -0.68 ± 0.13 | *p = 0.0016* |
| Ctrl wounded vs Wounded PheLigNPs | 0.25 ± 0.05 vs -1.37 ± 0.70 | *p < 0.0001* |
| Wounded LigNPs vs Wounded PheLigNPs | -0.68 ± 0.13vs -1.37 ± 0.70 | *p = 0.0094* |
| *gsk3β* | **Samples** | **Mean ± SD** | ***p Value*** |
| Ctrl not wounded vs Ctrl wounded | -0.003 ± 0.08 vs 0.10 ± 0.08 | *p = 0.8572* |
| Ctrl not wounded vs Wounded LigNPs | -0.003 ± 0.08 vs -0.78 ± 0.13 | *p = 0.1984* |
| Ctrl not wounded vs Wounded PheLigNPs | -0.003 ± 0.08 vs -1.98 ± 1.35 | *p = 0.0074* |
| Ctrl wounded vs Wounded LigNPs | 0.10 ± 0.08 vs -0.78 ± 0.13 | *p = 0.1509* |
| Ctrl wounded vs Wounded PheLigNPs | 0.10 ± 0.08 vs -1.98 ± 1.35 | *p = 0.0057* |
| Wounded LigNPs vs Wounded PheLigNPs | -0.78 ± 0.13 vs -1.98 ± 1.35 | *p = 0.0630* |
| *wnt10b* | **Samples** | **Mean ± SD** | ***p Value*** |
| Ctrl not wounded vs Ctrl wounded | -0.04 ± 0.44 vs 0.92 ± 0.26 | *p = 0.0059* |
| Ctrl not wounded vs Wounded LigNPs | -0.04 ± 0.44 vs 1.38 ± 0.31 | *p = 0.0006* |
| Ctrl not wounded vs Wounded PheLigNPs | -0.04 ± 0.44 vs 0.01 ± 0.22 | *p = 0.8321* |
| Ctrl wounded vs Wounded LigNPs | 0.92 ± 0.26 vs 1.38 ± 0.31 | *p = 0.1133* |
| Ctrl wounded vs Wounded PheLigNPs | 0.92 ± 0.26 vs 0.01 ± 0.22 | *p = 0.0082* |
| Wounded LigNPs vs Wounded PheLigNPs | 1.38 ± 0.31 vs 0.01 ± 0.22 | *p = 0.0008* |
